# Supplementary material
Source: PubMed Central journal article supplement (PMC6628202)
Supplement: NIHMS1035573-supplement-1.pdf [file NIHMS1035573-supplement-1.pdf]

## Appendix

### Supplemental Table 1

All grade 1 and 2 attributable toxicities seen on both strata 1 (A) and 3 (B).

#### A. Stratum 1

| PBTC-29B Stratum 1                   | Grade |    |   |    |
|--------------------------------------|-------|----|---|----|
|                                      | 1     |    | 2 |    |
|                                      | N     | %  | N | %  |
| Toxicity                             |       |    |   |    |
| Abdominal pain                       | 4     | 16 | . | .  |
| Alanine aminotransferase increased   | 11    | 44 | . | .  |
| Alkaline phosphatase increased       | 7     | 28 | . | .  |
| Alopecia                             | 3     | 12 | . | .  |
| Anemia                               | 17    | 68 | . | .  |
| Aspartate aminotransferase increased | 11    | 44 | 2 | 8  |
| CPK increased                        | 9     | 36 | 7 | 28 |
| Cheilitis                            | 2     | 8  | . | .  |
| Chills                               | 2     | 8  | . | .  |
| Constipation                         | 4     | 16 | . | .  |
| Cough                                | 3     | 12 | . | .  |
| Creatinine increased                 | .     | .  | 2 | 8  |
| Diarrhea                             | 11    | 44 | . | .  |
| Dizziness                            | 3     | 12 | . | .  |
| Dry skin                             | 9     | 36 | 4 | 16 |
| Edema limbs                          | 4     | 16 | 2 | 8  |
| Ejection fraction decreased          | .     | .  | 2 | 8  |
| Fatigue                              | 10    | 40 | 2 | 8  |
| Fever                                | 2     | 8  | . | .  |
| Headache                             | 5     | 20 | . | .  |
| Hyperglycemia                        | 5     | 20 | . | .  |
| Hyperkalemia                         | 2     | 8  | . | .  |
| Hypernatremia                        | 2     | 8  | . | .  |
| Hypoalbuminemia                      | 12    | 48 | 2 | 8  |
| Hypocalcemia                         | 5     | 20 | . | .  |
| Hypokalemia                          | 8     | 32 | . | .  |
| Hypomagnesemia                       | 10    | 40 | . | .  |
| Hyponatremia                         | 3     | 12 | . | .  |
| Hypophosphatemia                     | 4     | 16 | . | .  |
| Lymphocyte count decreased           | 6     | 24 | . | .  |

| PBTC-29B Stratum 1                             | Grade |    |   |    |
|------------------------------------------------|-------|----|---|----|
|                                                | 1     |    | 2 |    |
|                                                | N     | %  | N | %  |
| Lymphocyte count increased                     | .     | .  | 2 | 8  |
| Metabolism and nutrition disorders - Other     | 2     | 8  | . | .  |
| Nausea                                         | 6     | 24 | . | .  |
| Neutrophil count decreased                     | 2     | 8  | 4 | 16 |
| Paronychia                                     | 2     | 8  | 4 | 16 |
| Platelet count decreased                       | 3     | 12 | . | .  |
| Pruritus                                       | 3     | 12 | . | .  |
| Rash acneiform                                 | 10    | 40 | 3 | 12 |
| Rash maculo-papular                            | 8     | 32 | 3 | 12 |
| Skin and subcutaneous tissue disorders - Other | 5     | 20 | 3 | 12 |
| Skin infection                                 | .     | .  | 4 | 16 |
| Vomiting                                       | 8     | 32 | . | .  |
| White blood cell decreased                     | 7     | 28 | . | .  |

### B. Stratum 3

| PBTC-29B Stratum 3                   | Grade |    |   |    |
|--------------------------------------|-------|----|---|----|
|                                      | 1     |    | 2 |    |
|                                      | N     | %  | N | %  |
| Toxicity                             |       |    |   |    |
| Abdominal pain                       | 8     | 32 | . | .  |
| Alanine aminotransferase increased   | 7     | 28 | . | .  |
| Alkaline phosphatase increased       | 3     | 12 | . | .  |
| Alopecia                             | 3     | 12 | . | .  |
| Anemia                               | 8     | 32 | 2 | 8  |
| Anorexia                             | 3     | 12 | . | .  |
| Aspartate aminotransferase increased | 12    | 48 | . | .  |
| CPK increased                        | 12    | 48 | 6 | 24 |
| Constipation                         | 5     | 20 | . | .  |
| Cough                                | 4     | 16 | . | .  |
| Creatinine increased                 | 2     |    | 2 | 8  |
| Diarrhea                             | 12    | 48 | 4 | 16 |
| Dizziness                            | 2     | 8  | . | .  |
| Dry eye                              | 2     | 8  | . | .  |
| Dry skin                             | 11    | 4  | 4 | 16 |
| Edema limbs                          | 6     | 24 | . | .  |
| Ejection fraction decreased          | .     | .  | 4 | 16 |
| Epistaxis                            | 4     | 16 | . | .  |
| Eye disorders - Other                | 2     | 8  | . | .  |
| Fatigue                              | 14    | 56 | 2 | 8  |
| Gastrointestinal disorders - Other   | 3     | 12 | . | .  |
| Headache                             | 7     | 28 | . | .  |
| Hyperglycemia                        | 5     | 20 | . | .  |
| Hyperkalemia                         | 2     | 8  | . | .  |
| Hypernatremia                        | 2     | 8  | . | .  |
| Hypertension                         | 8     | 32 | 2 | 8  |
| Hypoalbuminemia                      | 14    | 56 | 3 | 12 |
| Hypocalcemia                         | 4     | 16 | . | .  |
| Hypokalemia                          | 4     | 16 | . | .  |
| Hypomagnesemia                       | 8     | 32 | . | .  |
| Hyponatremia                         | 2     | 8  | . | .  |
| Hypophosphatemia                     | 3     | 12 | . | .  |
| Investigations - Other               | 2     | 8  | . | .  |
| Lymphocyte count decreased           | 10    | 40 | 2 | 8  |

| PBTC-29B Stratum 3                             | Grade |    |    |    |
|------------------------------------------------|-------|----|----|----|
|                                                | 1     |    | 2  |    |
|                                                | N     | %  | N  | %  |
| Metabolism and nutrition disorders - Other     | 3     | 12 | .  | .  |
| Mucositis oral                                 | 4     | 16 | .  | .  |
| Nail infection                                 | 2     | 8  | .  | .  |
| Nausea                                         | 14    | 56 | .  | .  |
| Neutrophil count decreased                     | 4     | 16 | 4  | 16 |
| Pain                                           | 2     | 8  | .  | .  |
| Paronychia                                     | 2     | 8  | 11 | 44 |
| Platelet count decreased                       | 5     | 20 | .  | .  |
| Pruritus                                       | 5     | 20 | .  | .  |
| Rash acneiform                                 | 10    | 40 | 6  | 24 |
| Rash maculo-papular                            | 9     | 36 | 6  | 24 |
| Rectal hemorrhage                              | 2     | 8  | .  | .  |
| Skin and subcutaneous tissue disorders - Other | 13    | 52 | 4  | 16 |
| Skin infection                                 | .     | .  | 2  | 8  |
| Stomach pain                                   | 3     | 12 | .  | .  |
| Vomiting                                       | 13    | 52 | .  | .  |
| Weight gain                                    | .     | .  | 3  | 12 |
| White blood cell decreased                     | 11    | 44 | .  | .  |

## Supplemental Table 2

Grade 3 and 4 toxicities divided by stratum 1 (A) and stratum 3 (B).

### A: Stratum 1

| PBTC-29B Stratum 1                 | Grade |    |   |   |
|------------------------------------|-------|----|---|---|
|                                    | 3     |    | 4 |   |
|                                    | N     | %  | N | % |
| <u>Toxicity</u>                    |       |    |   |   |
| Alanine aminotransferase increased | 1     | 4  | . | . |
| CPK increased                      | 4     | 16 | . | . |
| Diarrhea                           | 1     | 4  | . | . |
| Headache                           | 1     | 4  | . | . |
| Lymphocyte count decreased         | .     | .  | 1 | 4 |
| Neutrophil count decreased         | 3     | 12 | . | . |
| Paronychia                         | 1     | 4  | . | . |
| Rash acneiform                     | 2     | 8  | . | . |
| Rash maculo-papular                | 2     | 8  | . | . |
| Tooth infection                    | 1     | 4  | . | . |
| Weight gain                        | 1     | 4  | . | . |

### B: Stratum 3

| PBTC-29B Stratum 3          | Grade |    |
|-----------------------------|-------|----|
|                             | 3     |    |
|                             | N     | %  |
| <u>Toxicity</u>             |       |    |
| CPK increased               | 1     | 4  |
| Diarrhea                    | 1     | 4  |
| Ejection fraction decreased | 1     | 4  |
| Gastric hemorrhage          | 1     | 4  |
| Paronychia                  | 2     | 8  |
| Rash maculo-papular         | 3     | 12 |
| Skin infection              | 1     | 4  |

**Supplemental Table 3**

Dose reduction on stratum 1 (A) and stratum 3 (B)

**A: Stratum 1**

| Accession Number | Assigned Dose (selumetinib mg/m <sup>2</sup> /dose BID) | Course when the reduction occurred | Reduced Dose (selumetinib mg/m <sup>2</sup> /dose BID) | Toxicity                |
|------------------|---------------------------------------------------------|------------------------------------|--------------------------------------------------------|-------------------------|
| 6                | 25                                                      | 1.4                                | 20                                                     | G3 rash                 |
| 40               | 25                                                      | 1.13                               | 20                                                     | G3 rash                 |
|                  | 25                                                      | 1.19                               | 15                                                     | G3 ALT increased        |
| 44               | 25                                                      | 1.3                                | 20                                                     | G3 CPK                  |
| 49               | 25                                                      | 1.3                                | 20                                                     | G3 CPK                  |
| 58               | 25                                                      | 1.6                                | 20                                                     | G2 intolerable headache |
| 60               | 25                                                      | 1.23                               | 20                                                     | G3 paronychia           |
| 75               | 25                                                      | 1.3                                | 20                                                     | G3 rash                 |
| 90               | 25                                                      | 1.24                               | 20                                                     | G3 tooth infection      |
| 91               | 25                                                      | 1.12                               | 20                                                     | G3 rash                 |
| 93               | 25                                                      | 1.2                                | 20                                                     | G2 intolerable rash     |

**B: Stratum 3**

| Accession Number | Assigned Dose (selumetinib mg/m <sup>2</sup> /dose BID) | Course when the reduction occurred | Reduced Dose (selumetinib mg/m <sup>2</sup> /dose BID) | Toxicity                              |
|------------------|---------------------------------------------------------|------------------------------------|--------------------------------------------------------|---------------------------------------|
| 7                | 25                                                      | 1.7                                | 20                                                     | G3 rash and G2 intolerable paronychia |
| 21               | 25                                                      | 1.1                                | 20                                                     | G2 intolerable rash                   |
| 26               | 25                                                      | 1.21                               | 20                                                     | G3 rash                               |
| 32               | 25                                                      | 1.9                                | 20                                                     | G3 skin infection.                    |
| 47               | 25                                                      | 1.8                                | 20                                                     | G3 rash                               |
| 59               | 25                                                      | 1.9                                | 20                                                     | G3 rash                               |
| 63               | 25                                                      | 1.17                               | 20                                                     | G3 rash                               |
| 83               | 25                                                      | 1.13                               | 20                                                     | G2 intolerable paronychia             |

**Supplemental Table 4**

Recruiting sites, number of eligible and evaluable patients recruited, and name of the responsible Principle Investigator

|                |                              | Stratum 1 | Stratum 3 | All |
|----------------|------------------------------|-----------|-----------|-----|
|                |                              | N         | N         | N   |
| Institution    | Local Principle Investigator |           |           |     |
| CCHMC          | Fouladi, Maryam              | 3         | 4         | 7   |
| CHLA           | Dhall, Girish                | 3         | .         | 3   |
| Chicago        | Fangusaro, Jason             | 6         | 4         | 10  |
| Children's DC  | Packer, Roger                | 2         | 3         | 5   |
| Duke           | Kreissman, Sue               | 2         | 2         | 4   |
| MSKCC          | Dunkel, Ira                  | .         | 3         | 3   |
| Pittsburgh     | Pollack, Ian                 | 1         | 7         | 8   |
| St. Jude       | Qaddoumi, Ibrahim            | 4         | 1         | 5   |
| Stanford       | Fisher, Paul                 | 3         | .         | 3   |
| Texas Children | Baxter, Patricia             | .         | 1         | 1   |
| UCSF           | Banerjee, Anurudha           | 1         | .         | 1   |
| All            |                              | 25        | 25        | 50  |

### Supplemental Figure 1

Visualization of DNA methylation array data by t-distributed stochastic neighbor embedding. Samples from PBTC-029B strata 1 and 3 (black dots) were compared with reference profiles of molecularly defined glioma/glioneuronal tumor groups. All analyzed trial samples showed similarities with pilocytic astrocytoma.

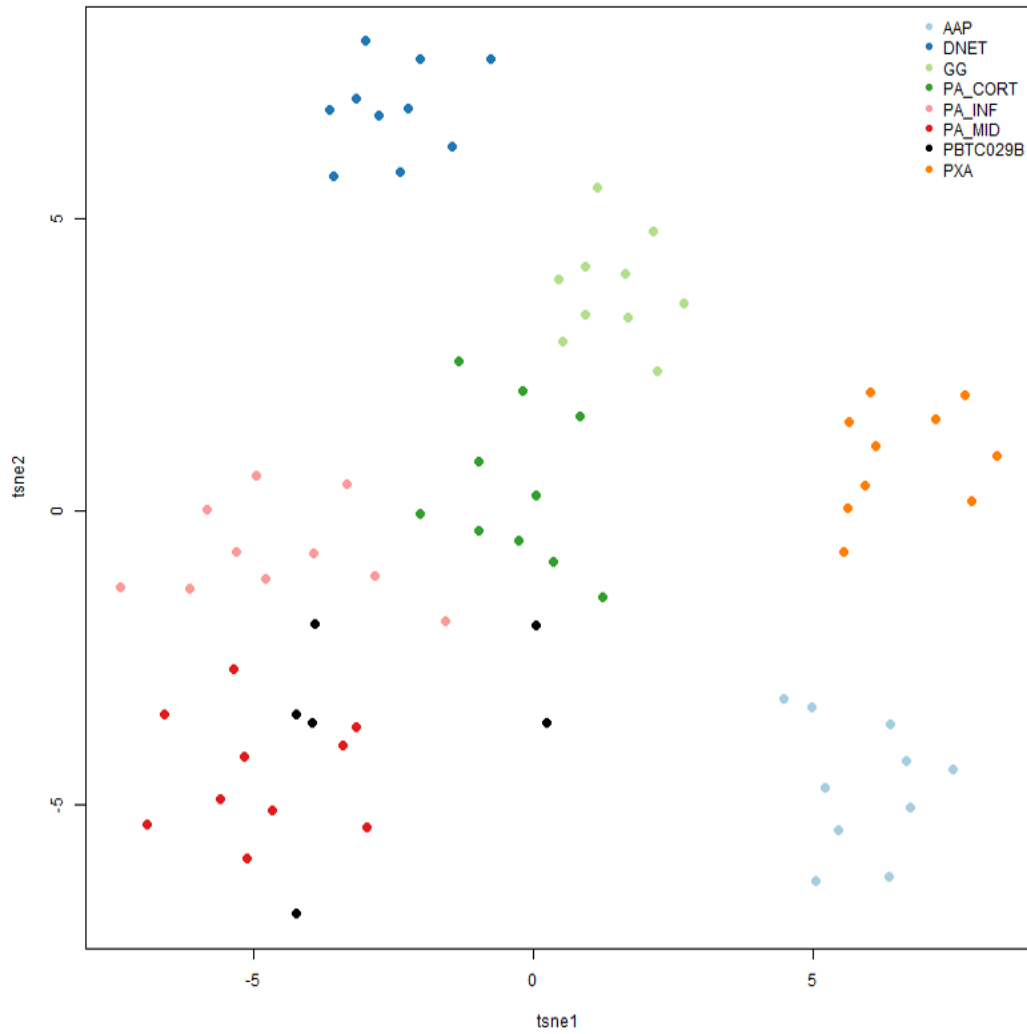

\*AAP, anaplastic astrocytoma with piloid features; DNET, dysembryoplastic neuroepithelial tumor; GG, ganglioglioma; PA\_CORT, cortical pilocytic astrocytoma; PA\_INF, infratentorial pilocytic astrocytoma; PA\_MID, midline pilocytic astrocytoma; PXA, pleomorphic xanthoastrocytoma.
